# Supplementary material for: The importance of model horizontal resolution for improved estimation of Snow Water Equivalent in a mountainous region of Western Canada
Source: Copernicus journal article supplement (doi:10.5194/egusphere-2024-42), 2024-03-06
Supplement: Supplementary file [file egusphere-2024-42-AC1-supplement.pdf]

A review of: “*The importance of model horizontal resolution for improved estimation of Snow Water Equivalent in a mountainous region of Western Canada*” by Samaneh Sabetghadam Christopher G. Fletcher and Andre Erler

**Brief Summary:** In this paper, the authors attempt to show the importance of high-resolution climate models for estimating SWE in mountainous regions. The study basin has 9 available CanSWE snow pillows with a continuous record. Comparisons of model SWE vs CanSWE records are made for 5 modeled datasets: WRF 9/3/1km, ERA5 and ERA5-Land. The authors chose to aggregate the 9 stations for the bulk of the analysis, while the individual stations are investigated in later sections. A brief investigation into the role of elevation and elevation bias in the models are made as well. The authors conclude that WRF at 1/3km resolution can provide a good estimate of SWE values in the South Saskatchewan River Basin and thus can be used for flood/runoff forecasting.

**Overall Thoughts:** The paper is well written and easy to understand. I have minor comments for some of the language used. I have two major concerns that I believe the authors should address prior to publication: I believe not enough snow pillow sites were used in the analysis, and the comparison of SWE point data to gridded model SWE is not justified adequately. I have included references of papers that expand upon these major concerns.

**Response:** The authors would like to thank the reviewer for the time and valuable comments and suggestions. Below the reviewer comments are in blue, our responses are in black. All changes are highlighted in red in the revised manuscript.

### Major Comments:

1. This study uses only 9 snow pillow sites for an area of ~ 100km x 60km. I have concerns that the number of stations used is too low. The authors do not present any work to suggest that this number of stations is statistically significant and thus viable to compare against the gridded data set. With a sample size of only 9 stations, the aggregation of the stations to compare against the modeled SWE does not seem appropriate. Further work to show that these results are statistically significant and unbiased.

a. In line with this comment, I suggest the authors include standard deviation and/or mean absolute error metrics for their results.

**Response:** We do agree that having more data can lead to more accurate and reliable results, however, it's also important to consider the quality of the data. The presence of a small amount of high-quality station providing daily SWE data over the study period, can lead to meaningful insights. Following an extensive investigation of the CANSWE dataset, we identified nine stations meeting this criterion, meaning they consistently offer daily SWE values with minimal data gaps. These stations have been selected based on their consistent daily SWE data availability among stations in the region. Though, based on the reviewer's suggestion, we also add mean absolute error and standard deviation metrics to our statistical analysis. Figure 1, 4, 7 and 10 has been updated. More analysis is added to the manuscript about the agreement between the metrics which confirms that the results are unbiased and statistically significant.

2. The SWE time series shown in figure 2 are based off the spatially aggregated station results. However, when you look at the SWE time series for the individual stations (figure 5), the results seem at odds with figure 2. There are several instances of the “best” data product (WRF 1k) differing from CanSWE by what appears to be 50% or more. Therefore, I suspect the aggregate results is likely

averaging out the mischaracterized stations. This discrepancy is glossed over in the manuscript and takes away from any claims the authors attempt to make about the relative value of high resolution WRF runs. Again, calculation standard deviation and mean absolute bias/error for the individual stations and expanding the discussion of those results would be helpful.

**Response:** Based on the reviewer's comment, mean absolute error and standard deviation are calculated for individual stations as well. Discussion is added to the text about the agreement between the metrics. As mentioned in the manuscript, aggregation of the station may smooth the differences between estimations and observation. This effect is introduced in the literature as aggregation filtering. Additionally, the point-to-grid comparison can introduce uncertainties in the verification results for individual stations. This has been added to the text for more clarification. Also, it should be noted that, our primary focus is on estimating spatio-temporal variation of SWE across the SSRB region, rather than claiming WRF's precision in estimating SWE at a specific point scale.

3. The comparison of point data SWE to gridded data SWE is difficult (*see Blöschl, 1999*). By design, snow pillows are not representative of typical mountain terrain. Snow pillows are placed in (relatively) open and flat clearings where they can accurately report on the mass of falling snow while being protected from the wind from surrounding tree cover. However, the processes that impact the actual spatial distribution of snow in mountains are not well represented by the local environment that is conducive to snow pillow placement. Many of the processes that govern snow depth in mountain environments are happening on sub 1km scales. Preferential deposition and vegetation presence are important factors that operate on the <100m scale, which is not resolved by any of the model resolutions in this study. See Clark et al., (2011) for more details on these processes.

The authors claim the higher resolution modeled runs are more accurate, but the results presented do not show this. They show that the spatial variability of the grid cell sizing is impacting the SWE estimate from the model. This can be clearly seen in the elevation bias component of the results section (specifically figure 10). Looking at Station 1, the elevation bias for the 3km and 1km model runs are ~+300m and ~+260m respectively. This results in a massive overestimation of snow accumulation by the model. Meanwhile, the 9km model run has an elevation bias of only -30m and shows the typical WRF underestimation of SWE (i.e. Wrzesien et al., 2018)

a. How can the authors be sure their results are showing the differences in model resolution as opposed to the difference in spatial variability due to the elevation bias in the model?

b. See *Scaling Issues in Snow Hydrology* (Blöschl, 1999) for more details.

c. See Rice & Bales (2010) and Dressler et al., (2006) for more info on snow pillow site selection.

**Response:** Thanks for pointing out this issue. As stated in the text, we acknowledged that the point comparison is challenging. We add discussions to the result section based on the suggested references. All suggested references have been read in detail and referred in the manuscript. We mentioned that elevation bias is not significantly correlated with error metrics at any resolution. On average, the elevation bias has the highest value in WRF3K, but the SWE has better performance in WRF1K. We supposed that estimated errors in SWE likely depends on other atmospheric variables rather than elevation and additional perspectives could be considered in future work to better understand the mechanisms and potential cause of uncertainties in SWE estimations over the mountains. This needs accurate evaluation of elevation estimates by WRF over the mountainous regions and would be the focal point of our next study.

#### Minor Comments:

1. The authors do not refer to the model simulations with consistent language. For example, figure 3 refers to them as WRFD1/D2/D3. While the plot colors match figure 2 which refers to them explicitly as WRF(9km) (3km) (1km), the reader is forced to double check against the figure. I suggest the authors define a consistent naming format early in the paper and stick to it. It could be as simple as “the 9 km WRF runs will be referred to as WRF9K for the remainder of this paper” etc.

**Response:** It has been changed to a consistent naming format thorough the main manuscript, figures and tables. WRF9K, WRF3K and WRF1K referred to 9, 3 and 1 km WRF runs respectively. Those are introduced in the section 2.

2. The authors bounce around between their use of increase/decrease, fine/coarse, high/low in a confusing manner. A more consistent verbiage would make it easier for the reader. Improving the precision of language would increase the readability of the paper. For example, phrases like “less than 4km resolution” are very confusing.

- a. Interpreted literally; one could assume they meant “a resolution with a numeric value lower than 4”. i.e., a finer resolution
- b. However, it is equally fair to interpret that as “a resolution with less spatial fidelity than 4km” i.e., a coarser resolution.

**Response:** The manuscript has been revised and more consistent language has been replaced where it is confusing.

3. The introduction reads poorly. The layout does not flow well and feels disjointed in some of the paragraph transitions. Please consider restructuring.

**Response:** Following this suggestion it has been restructured and revised.

- a. Line 97 has an extra “ERA5 and ERA5-land” in it.

**Response:** It has been removed.

4. The hypothesis of this entire manuscript feels unclear to me. I’m unsure if the authors believe WRF estimates of SWE are appropriate for use at basin scale, grid scale, or both.

- a. My inclination is that they believe it is appropriate for basin scale estimation, but discussion around the analysis of individual stations also leads me to believe they are implying some level of reliability in estimating SWE at grid/point scale.
- b. I highly suggest the authors refine the scope and goals of this manuscript and reframe the title/hypothesis/abstract/conclusion appropriately.

**Response:** There are few studies have been performed regionally (especially in Canada) to validate the WRF model estimation of the spatial and temporal patterns in SWE and other snow properties. Previous studies (mostly over the USA) shows that model horizontal resolution is one of the key factors that should be improved to increase the accuracy of a simulated snowpack. The main goal of the current paper is to evaluate the potential of high-resolution WRF model run to correctly simulate the daily values of snow water equivalent over the SSRB region in Canada. Results indicate that WRF performs well in estimating SWE over an entire watershed. However, it is important to note that we do not assert that WRF’s accuracy in estimating SWE at a specific point scale. This clarification has been included in the text.

5. I feel that the inclusion of ERA5 and ERA5-L in the analysis is mostly left out. In the current state it feels like it has been added just to have an extra point of comparison. I feel that the authors should expand upon this analysis in a written discussion or remove it.

**Response:** ERA5 and ERA5-L are used to evaluate their SWE values (as the initial conditions for WRF) and to understand the role of resolution in SWE estimation. ERA5-L is widely regarded as the state-of-the-art land surface reanalysis and offers a relatively high resolution (9km), homogenous, long-term observation-based data record. As a gridded, model-based product, ERA5L provides the ideal benchmark against which other observation-based model estimates should be compared. Our WRF simulations are driven by ERA5 atmospheric forcing at the boundary. Therefore, we wish to assess whether the WRF simulations perform better than ERA5L at estimating aggregated SWE over SSRB. The ERA5 results suggest that improved resolution improves SWE estimation. It's interesting that the ERA5L SWE (9km) performs less well than the WRF9K simulation. Our preliminary results (from Fig.2, 4 and 5) show that ERA5 and ERA5-L underestimate SWE values and there is a distinct difference between SWE from these reanalysis data and observational data. So, for the rest of the evaluation, we focused on the WRF estimation.

6. The investigation in elevation bias in section 3.3 is interesting but not fully explored. I suggest the authors expand on this section.

a. Line 301 states “when elevation biases are largest (at 9km)” but both figure 10 and table 2 show that the largest bias (both positive and negative) occur in the 3km runs. Please clarify if this is an error or if some other metric (possibly mean absolute bias?) was used to justify this statement.

**Response:** Thank you very much for highlighting this issue, this is an error and it has been corrected. As previously noted, the elevation bias is typically highest in WRF3K, while SWE performance is the best in WRF1K. Then we hypothesize that errors in SWE estimation maybe influenced by variables beyond elevation. This has been added to the manuscript.

In conclusion, the work presented in this manuscript has significant issues in the underlying assumptions made by the authors. Should the authors reframe their hypothesis and conclusions based on their results, a further iteration of this work could be publishable. The defense of the statistical significance of this work with only 9 snow pillow sites is required. Changes in their justification of their comparison of snow-pillow SWE to gridded model results is necessary. A significantly expanded discussion of the individual station analysis is necessary as well. Further statistical error metrics are necessary for those individual station results. Finally, I recommend the authors expand upon the elevation bias section of the manuscript.

**Response:** All suggested changings have been made accordingly to the reviewer's comment which improves the quality of the paper.

#### **References:**

Blöschl, G. (1999). Scaling issues in snow hydrology. *Hydrological Processes*, 13(14–15), 2149–2175. [https://doi.org/10.1002/\(SICI\)1099-1085\(199910\)13:14/15<2149::AIDHYP847>3.0.CO;2-8](https://doi.org/10.1002/(SICI)1099-1085(199910)13:14/15<2149::AIDHYP847>3.0.CO;2-8)

Clark, M. P., Hendrikx, J., Slater, A. G., Kavetski, D., Anderson, B., Cullen, N. J., Kerr, T., Örn Hreinsson, E., & Woods, R. A. (2011). Representing spatial variability of snow water equivalent in hydrologic and land-surface models: A review. *Water Resources Research*, 47(7), 2011WR010745. [hDps://doi.org/10.1029/2011WR010745](https://doi.org/10.1029/2011WR010745)

Dressler, K. A., Fassnacht, S. R., & Bales, R. C. (2006). A Comparison of Snow Telemetry and Snow Course Measurements in the Colorado River Basin. *JOURNAL OF HYDROMETEOROLOGY*, 7.

Rice, R., & Bales, R. C. (2010). Embedded-sensor network design for snow cover measurements around snow pillow and snow course sites in the Sierra Nevada of California. *Water Resources Research*, 46(3). <https://doi.org/10.1029/2008WR007318> open\_in\_new

Wrzesien, M. L., Durand, M. T., Pavelsky, T. M., Kapnick, S. B., Zhang, Y., Guo, J., & Shum, C. K. (2018). A New Estimate of North American Mountain Snow Accumulation From Regional Climate Model Simulations. *Geophysical Research Letters*, 45(3), 1423–1432.  
[hDps://doi.org/10.1002/2017GL076664](https://doi.org/10.1002/2017GL076664)

# The importance of model horizontal resolution for improved estimation of Snow Water Equivalent in a mountainous region of Western Canada

Samaneh Sabetghadam<sup>1,2</sup>, Christopher G. Fletcher<sup>2</sup> and Andre Erler<sup>3</sup>

<sup>1</sup> *Institute of Geophysics, University of Tehran, Tehran, Iran*

<sup>2</sup> *Department of Geography & Environmental Management, University of Waterloo, Ontario, Canada*

<sup>3</sup> *Aquanty Inc., Waterloo, Ontario, Canada*

## Abstract

Accurate estimation of snow water equivalent (SWE) over high mountainous regions is essential to support water resource management. Due to the sparse distribution of in situ observations in these regions, weather forecast models have been used to estimate SWE. However, the influence of horizontal resolution on the accuracy of the snow simulation remains poorly understood. The objective of this study is to evaluate the potential of the Weather Research and Forecasting (WRF) model run at horizontal resolutions of 9, 3 and 1 km to estimate the daily values of SWE over the mountainous South Saskatchewan River Basin (SSRB) in Western Canada for a representative water year, 2017-18. **Special focus is given to investigating the impact of the WRF model grid cell size on accurate estimation of the peak time and value of SWE across the watershed.** Observations from manual snow surveys show an accumulation period from October 2017 to the annual peak in April 2018, followed by a melting period to the end of water year. All WRF simulations tend to underestimate annual SWE, with largest biases (up to 58 kg/m<sup>2</sup>, i.e. relatively 24%) found at higher elevations and in simulations at coarser horizontal resolution. The two higher-resolution simulations capture the magnitude (and timing) of peak SWE very accurately, with only a 3 to 6% low bias for 1 km and 3 km simulations, respectively. This demonstrates that a 1 km resolution may be appropriate for estimating SWE accumulation across the region. A relationship is identified between model elevation bias and SWE biases, suggesting that the smoothing of topographic features at lower horizontal resolution leads to lower grid cell elevations, warmer temperatures, and lower SWE. Overall, this study indicates that high resolution WRF simulations can provide reliable SWE values as an accurate input for hydrologic modeling over a sparsely monitored mountainous catchment.

**Keywords:** Snow water equivalent (SWE); WRF model; bias; South Saskatchewan River Basin (SSRB).

## 1. Introduction

On average, almost 65% of Canada's landmass is covered by annual snow cover for more than six months of the year (ECCC, 2022). Melting snow in spring is a critical component of the water cycle to determine water supplies and flood risk; however, estimating the effect of snowmelt on flooding depends on a reliable estimate of snow water equivalent (SWE) (Dozier et al. 2016; Wrzesien et al. 2017; Vionnet et al., 2020). SWE is defined as the product of snowpack depth and bulk density and is a key environmental variable for understanding climate (Brown et al., 2019). It represents the vertical depth of water that would be obtained if all the snow cover melted completely



(WMO, 2018). The value of SWE shows the amount of liquid water, which is produced from a melting snowpack.

Spatiotemporal distribution of SWE, particularly within northern latitudes and higher elevations, shows the extent of spring and summer runoff (Barnet et al., 2005; King et al., 2020). Due to the sparse distribution of in situ observations globally, regional weather forecast models are recently used to estimate the amount of SWE (Klehmet et al., 2013; Wrzesien et al. 2017; Raparelli et al., 2021). Reliable and accurate estimation of SWE has been significantly required to improve management and analyses of water resources. It is also essential for other applications, including global snow hydrology, global change analysis, and risk assessment (Taheri and Mahmoudian, 2022).

Although there have been many studies that evaluate temperature and precipitation simulations over North America (Diaconescu et al., 2016; Xu et al., 2019; Holtzman et al., 2020), few studies have been performed regionally to validate the model estimation of the spatial and temporal patterns in SWE (e.g., Alonso-González et al. 2018; Mortezapour et al., 2020). There is ample evidence from previous studies that model horizontal resolution is one of the key factors that should be improved to increase the accuracy of a simulated snowpack (Blöschl, 1999; Leung et al. 2003). Regional climate simulations using a coarse horizontal grid spacing typically underestimate the snowfall compared to the observations. One specific example showed that reducing MM5 model (fifth-generation Penn State–NCAR Mesoscale Model) grid spacing to 13 km led to an improved estimation of the snowpack for the western United States (Leung and Qian, 2003). Garvert et al. (2007) found that a high-resolution mesoscale model is required to appropriately simulate the snowfall over a complex terrain and to produce updraft and downdrafts that had a significant impact on the snowfall patterns. The WRF (Weather Research and Forecasting) model simulations at 2-km grid spacing for the Colorado Rocky Mountains are analyzed by Rasmussen et al. (2011). The estimations are verified using Snowpack Telemetry (SNOTEL) data. Their results show that the model successfully simulated spatial and temporal patterns of SWE over the region.

The Rocky Mountains in the USA and Canada stretch from the northernmost part of western Canada, to the northern New Mexico in the southwestern United States. The eastern slopes of the Canadian Rocky Mountains, is a complex region and several factors such as season, vegetation, and topography, control the discharge of headwater streams from high elevation catchments to valley bottoms (Hauer et al., 1997). Our study region comprises the eastern foothills region of the Rocky Mountains and the mountain headwaters region of the South Saskatchewan River Basin (SSRB) (see Fig. 1) and it has been more focused on the western SSRB region, which includes mountainous areas of the SSRB. The SSRB in Western Canada is a major agricultural basin of Canada with a semi-arid climate and highly dependent on surface water (Martz et al. 2007) which mainly comes from the spring snowmelt (Tanzeeba and Gan, 2012). The SSRB is a major sub-basin of the Nelson River Basin of Canada, rising from the Rocky Mountains in the west and extending eastward through southern Alberta (Tanzeeba and Gan, 2012). The watershed has a sub humid to semiarid continental climate. Temperatures can reach 40°C during the summer and -40°C during winter (Martz et al. 2007). During the wintertime, precipitation is principally in the form of snow. Most of the annual runoff (around 70%) of the rivers in this region is supplied from the Rocky Mountains and the foothills (Ashmore and Church 2001). Annually SSRB accounts for nearly 57% of the total water allocated in Alberta. The surface water supply in SSRB region mainly comes from the spring snowmelt (Tanzeeba and Gan, 2012), which makes it highly suitable to study the variability of SWE and its potential hydrologic impact.

The main objective of this paper is to evaluate the potential of the high-resolution Weather Research and Forecasting (WRF) model run to correctly simulate the daily values of snow water equivalent (SWE) over the SSRB region. To pursue this objective, in-situ observation of snow using the Canadian historical Snow Water Equivalent (CanSWE) dataset is used to evaluate the potential of WRF to detect the variability in SWE. Particular attention is paid to investigate the role of WRF model grid cell size on the accurate estimation of peak SWE time and value across the watershed. The impact of elevation has been also examined by evaluating several statistical diagnostics. This study can provide information related to the regional water management and hazard prevention.

This paper is organized as follows. Section 2 includes the details about the study region as well as introduction on WRF model, ERA5, ERA5-Land and CanSWE dataset. Section 3.1 analyze the area-averaged temporal evaluation of WRF SWE and quantifies bias and errors between WRF, ERA5, ERA5-Land and CanSWE dataset throughout the study period. Section 3.2 present WRF SWE spatial evaluations for individual stations using statistical metrics, so can provide insights into probable impact of elevation on biases, which is studied in section 3.3. A summary and conclusions are provided in Sect. 4.

## 2. Data and Methodology

### 2-1 CanSWE dataset

In-situ observation of SWE has been widely used in many applications including water and flood forecasting, climate studies, and evaluation of numerical weather prediction models. SWE can be measured manually or automatically as the mathematical product of snow depth and density. The methods that widely are used to measure SWE include, snow cores, snow pits and snow pillows (Elder et al., 1998; Andreadis and Lettenmaier, 2006; Dixon and Boon, 2012). Snow pits and snow courses are manual methods and rely on interpolation to characterize snow depth. This may lead to some errors if snow depth is variable (Lopez-Moreno et al., 2011). However, Snow pillows, measuring SWE by weighing the mass of a snow column, are the most common automatic method for continuous monitoring of SWE at a fixed location. It provides valuable time series of snow, despite they are spatially sparse and expensive to install and maintain (Johnson and Marks, 2004).

The Canadian historical Snow Water Equivalent dataset (CanSWE) combines manual (snow surveys) and automated (includes snow snow pillows and passive gamma sensors) pan-Canadian SWE observations (Vionnet et al., 2021). This new dataset replaces the Canadian Historical Snow Survey (CHSSD) dataset (Brown et al., 2019) by correcting the metadata, removing duplicate observations and controlling the quality of the records. In Canada, the majority of in situ SWE measurements are collected by provincial or territorial governments and hydropower companies and their partners. CanSWE dataset was compiled from 15 different sources and includes SWE information for all provinces and territories that measure SWE from 2607 locations across Canada over the period from 1928 to 2020. More details on this dataset are provided by Vionnet et al. (2021).

Table 1 shows the location of stations selected to evaluate WRF model performance. **Nine stations have been selected based on the availability of daily SWE data with minimal data gaps, obtained from automated snow pillow stations, during the study period.** These stations were located over the area represented by the innermost WRF model domain. The evaluation was conducted from 1st October 2017 to 1st October 2018, as the 2018 water year. Our preliminary investigation shows that the 2018 water year had approximately average SWE values during 1984 to 2021 according to the CanSWE



stations. Therefore, 2018 can be a representative of the region’s climate over the past 38 years. Statistical metrics were considered to evaluate the model simulations against CanSWE data: root-mean squared error (RMSE), mean bias (MB), **mean absolute error (MAE) and standard deviation (SD)**. The evaluation has been done for each station as well as the aggregate of the stations by examining SWE timeseries and its annual and spatial distribution.

Table 1. Location of the stations from CanSWE in British Columbia and Alberta.

| Station name         | Station Number | Lattitude | Longitude | Elevation (m) | Province         |
|----------------------|----------------|-----------|-----------|---------------|------------------|
| Wild Cat Creek       | 1              | 51.70     | -116.63   | 2122          | British Columbia |
| Skoki Lodge          | 2              | 51.54     | -116.06   | 2120          | Alberta          |
| Floe Lake            | 3              | 51.05     | -116.13   | 2090          | British Columbia |
| Sunshine Village     | 4              | 51.08     | -115.78   | 2230          | Alberta          |
| Three Isle Lake      | 5              | 50.63     | -115.28   | 2160          | Alberta          |
| Little Elbow Summit  | 6              | 50.71     | -114.99   | 2120          | Alberta          |
| Mount Oldum          | 7              | 50.49     | -114.91   | 2060          | Alberta          |
| Lost Creek South     | 8              | 50.17     | -114.71   | 2130          | Alberta          |
| Soth Racehorse Creek | 9              | 49.78     | -114.60   | 1920          | Alberta          |

## 2-2 WRF model configuration

The Weather Research and Forecasting (WRF) model was developed by the National Center for Atmospheric Research (NCAR) to support both operational weather forecasting and atmospheric research. Detailed documentation of WRF model can be found in Skamarock et al. (2008). In this study, the Advanced Research WRF (ARW) version 4.3.2 is used with three one-way nested domains, each with progressively finer horizontal resolution. The outer domain has a resolution of 9 km and covers most of western Canada (Fig.1). The middle domain, with a resolution of 3 km, extends over British Columbia and parts of Alberta. The innermost domain has the highest horizontal resolution of 1 km and covers the western part of the Southern Saskatchewan River Basin (Fig.1). This version of WRF runs with 38 vertical levels between the Earth's surface and a model top at 50 hPa, which is the same for all domains. **For the remainder of this paper, the WRF simulations at 9 km, 3 km, and 1 km resolutions will be referred as WRF9K, WRF3K, and WRF1K, respectively.** The initial and lateral boundary conditions are derived from the 3-hourly and 0.25° resolution ERA5 reanalysis (Hersbach et al., 2020) from the European Centre for Medium-Range Weather Forecasts (ECMWF). Simulation results are output on a 6-hour time step, which is aggregated to daily frequency for direct comparison with observations.

The physical parameterization schemes are selected based on previous studies that employ the WRF model to evaluate the simulation of terrestrial snow accumulation over the northern hemisphere (e.g., Niu et al., 2011; Wrzesien et al. 2015; Liu et al., 2017; Li and Li, 2021). In particular, the Thompson et al. (2008) cloud microphysics scheme, the rapid radiative transfer model longwave scheme (Mlawer et al., 1997), the Dudhia shortwave scheme (Dudhia, 1989), the Yonsei University planetary boundary layer scheme (Hong et al., 2006), the modified Kain–Fritsch convective parameterization for the outer domain (Kain and Fritsch, 1990, 1993; Kain, 2004), and the Noah LSM with multi-parameterization (Noah-MP) option (Niu et al., 2011) are used here. Previous studies show that Noah-MP simulates snow more accurately at finer resolution than previous versions of the Noah land surface model (e.g., Wrzesien et al. 2015). Simulated values were extracted at the nearest grid-cell

corresponding to the location of each station, assuming that the in-situ observation is representative of a model gridded area. It is acknowledged that such point comparisons of SWE are inherently challenging due to the heterogeneity in elevation, aspect and land cover (Cui et al., 2023). However, given the reasonably representative station density within the innermost WRF domain (Fig.1), we attempt to mitigate these issues by also comparing simulated and observed spatial mean SWE using a spatial mean taken over all stations.

The evaluation of WRF results in the current study has been focused on the discussion on innermost domain that includes the eastern foothills region of the Rocky Mountains and the mountain headwaters region of the SSRB (Fig. 1). We emphasize that this innermost domain is simulated at all three resolutions; in other words, at each resolution the model produces output over its entire domain, not just the outer part.

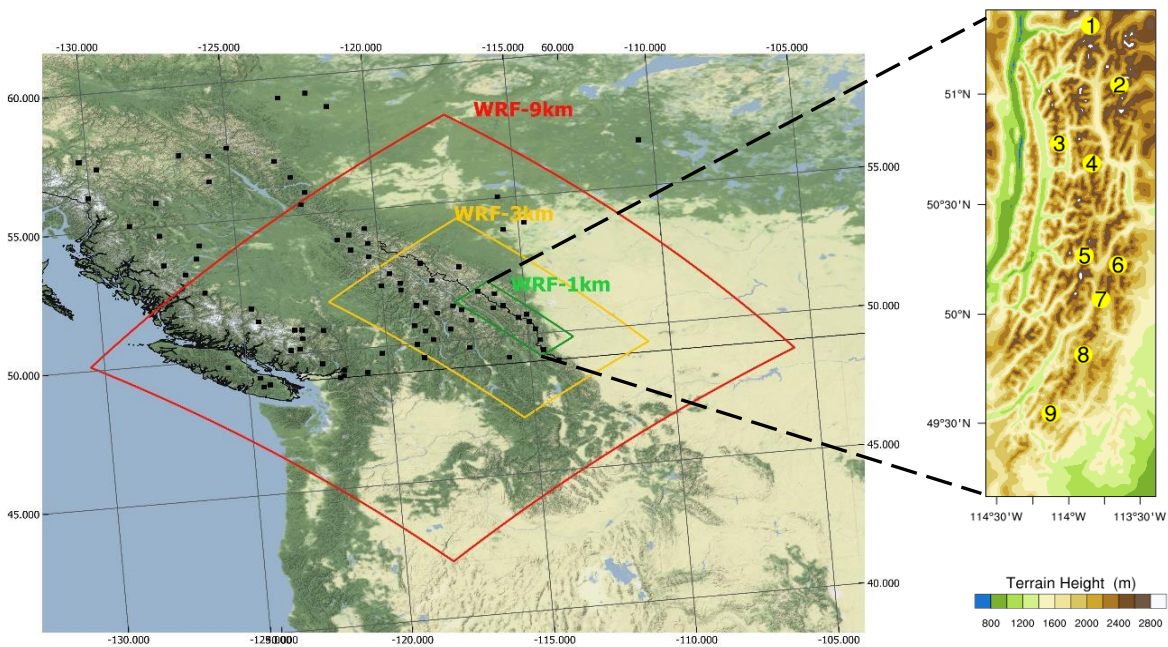

Figure 1. WRF model domains over Western Canada and the terrain height for the inner domain. The outer boundary of the 9km (red), 3km (yellow) and 1km (green) domains are indicated by the rectangles. Black squares indicate the location of CanSWE automated stations in British Columbia and Alberta. The topography of the 1km domain is shown magnified on the right with the CanSWE stations from Table 1 indicated in the yellow circles.

### 2-3 ERA5 and ERA5-L

The datasets used in this study also included ERA5 and ERA5-Land (hereafter, ERA-L), to explore the consistency of the ERA5 and ERA5-L reanalysis datasets in the SWE estimation. As mentioned in section 2-2, the  $0.25^\circ$  resolution ERA5 reanalysis has been also used as the initial and lateral boundary conditions for WRF run. ERA5 is the fifth generation ECMWF atmospheric reanalysis (Hersbach et al., 2020) and has a grid resolution of 31 km. This is higher resolution than in the older ERA-Interim of 80 km. ERA5 is based on advanced modeling and data assimilation systems, i.e. the Integrated Forecasting System (IFS) Cycle 41r2, and combines large amounts of historical observations into global estimates. It provides hourly fields for all variables. ERA5 assimilates snow properties from several SYNOP stations, and from year 2004 onwards, it also uses IMS data over NH (Hersbach et al., 2020). On the other hand, ERA5-L is the land component from ERA5 with a finer

spatial resolution of 9 km. It is produced with land model H\_TESSEL and without coupling the atmospheric module without data assimilation (Muñoz-Sabater et al., 2021). These reanalysis data are used to evaluate their SWE values and to understand the role of resolution in SWE estimation over the region.

### 3. Results

#### 3-1 Evaluation of the spatial mean SWE

The time series of daily SWE values from CanSWE, ERA5, ERA5-L and WRF simulations averaged over the inner domain of the SSRB are presented in Figure 2. **The results suggest that, on average, improved resolution improves SWE estimation.** The seasonal cycle of SWE in observations shows a clear accumulation period from Oct 1 to peak SWE (648 mm) in late April, and a melting period from late April until late June. In general, this seasonal evolution of the snowpack is well represented by the WRF simulations at all three resolutions as well as the reanalysis ERA5 and ERA5-L. However, in agreement with previous studies (e.g., Wrzesien et al. 2018), our results confirm that the reanalysis products significantly underestimate mountain SWE. **The ERA5-L SWE at 9km resolution performs less well than the WRF9K simulation.** The peak SWE occurs on the same day, 22<sup>nd</sup> April, for all WRF resolutions and the CanSWE observations, indicating that the WRF model is conserving the primary details of the meteorological lateral boundary forcing required for snow accumulation and melt. The two higher-resolution simulations (3km and 1km) capture the magnitude of peak SWE very accurately, with only a 3 to 6% low bias for **WRF1K and WRF3K** over the accumulation period, respectively. This demonstrates that both simulations may have value for providing accurate estimates of average SWE accumulation **across the study region. The standard deviation values illustrate the disparity between the CanSWE-SD and estimated-SD, highlighting their inconsistency (Figure 2). The lowest SD were associated with WRF1K, indicates a smaller spread between the WRF1K and CanSWE dataset, suggesting relative consistency and less variability in their values.** WRF9K simulation displays a systematic low bias of about 108 mm (31%) in SWE throughout the accumulation period, suggesting that either there is too little total precipitation reaching the surface at this resolution, or a temperature bias is causing a lower proportion of precipitation to fall as snow. Examining the role of these two forcings on simulated SWE at the three resolutions, we find very close agreement in temperature (Fig.3a), but a systematic low bias in accumulated precipitation at **WRF9K** (Fig.3b), indicating that lower total precipitation is the most likely cause of the SWE bias at the lowest resolution. The WRF simulations are configured using a 3-hourly ERA5 forcing at the lateral boundary (i.e., the boundary of the 9km domain). Therefore, the fact that the **WRF9K** produces lower total accumulated precipitation than the two higher-resolution simulations over a mountainous region strongly suggests that the cause is orographic enhancement of precipitation within WRF. Interestingly, given that all three of our domains have higher resolutions than ERA5 itself (27 km), this implies that underestimated orographic enhancement may be contributing to a low bias in precipitation at high elevations in ERA5, which in turn leads to a low bias in SWE (Fig.2).

Figure 2 also shows that the WRF simulation at all three resolutions estimates the melting period in two phases: a rapid phase from April to early Jun, then a more gradual phase until late June. Also, the difference in melt rate between the two phases is most apparent at the lower resolutions, indicating

that melt processes may be more accurately represented at higher resolution based on the melting rate.

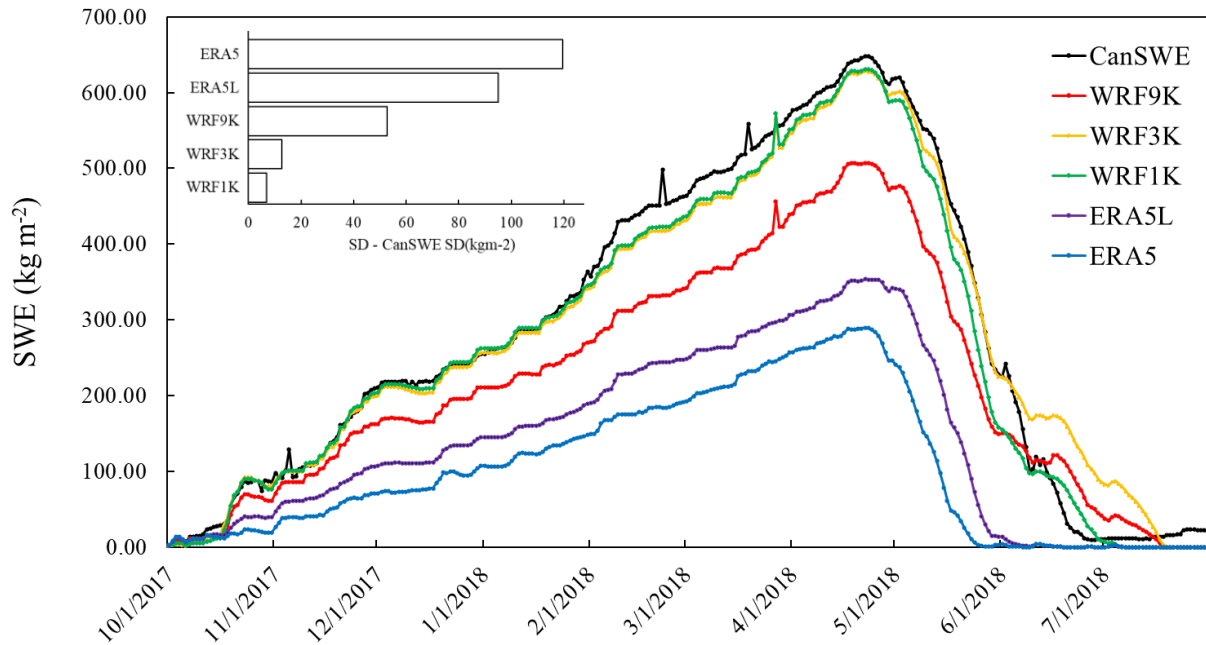

Figure 2. Temporal variation of SWE, from CanSWE data, WRF model resolutions, ERA5L and ERA5 over the SSRB region. The SWE data are aggregated for all stations inside the innermost domain. The spikes in the graph correspond to snowfall events, indicating the accumulation and subsequent melting of snow. The difference between CanSWE SD and each dataset is shown in the upper left.

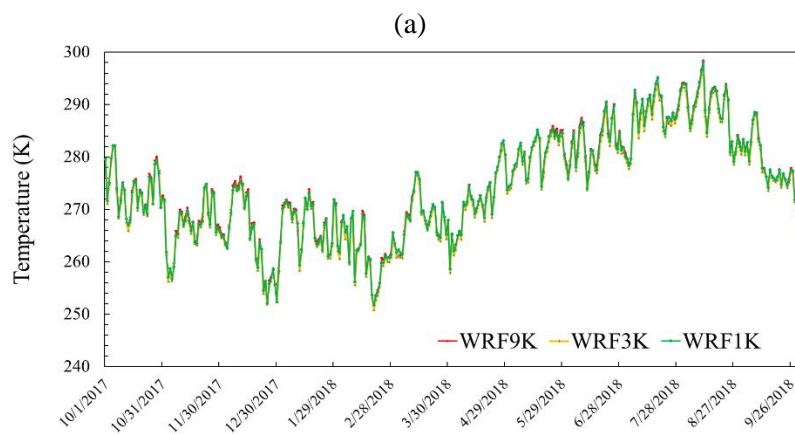

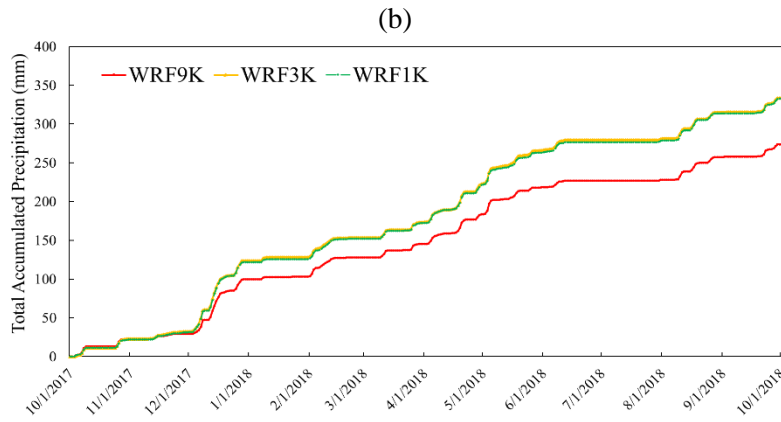

Figure 3. Temporal variation of 2m temperature (a) and precipitation (b) from the three WRF model resolutions over the SSRB region for the innermost domain.

Summary statistics for the melting and accumulation period are shown in Figure 4 presents the RMSE, MB, MAE and SD over the region. Generally, Fig. 4 suggests that there is an obvious tendency for RMSE, MB, MAE and SD to decrease at finer resolutions. Following ERA5 with 27 km and ERA5-L with 9km resolution, the coarsest model run shows a high value for RMSE especially during accumulation period. WRF9K underestimate SWE values more than the other two finer resolutions during both understudied periods, perhaps due to the incapability of the WRF9K to simulate the processes that are responsible for snow deposition and redistribution in mountainous areas that are characterized by heterogeneous snow distribution. Lower error metrics in WRF3K and WRF1K shows the effect of the model’s scale on the estimation of SWE, leading to biases in SWE simulation. The standard deviation values indicate that, overall, the variance of the estimation differs from the observations, however, there is a trend of decreasing SD with finer resolution, such as in WRF3K and WRF1K. The decrease in SD aligns with lower MAE, RMSE and bias in WRF1K SWE estimation.

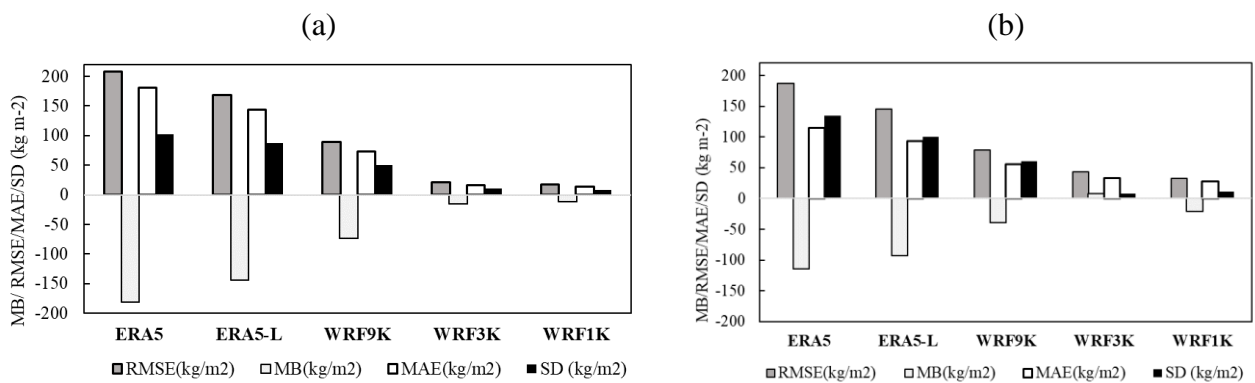

Figure 4. SWE evaluation during (a) accumulation period (1st October 2017- 22nd April 2018) and (b) melting period (23rd April 2018 to 1st October 2018) over the inner WRF model domain using RMSE, MB, MAE and SD.

### 3-2 Evaluation of spatially varying SWE



In this section, the representation of spatial heterogeneity of SWE in the WRF simulations is evaluated by comparing observed and simulated SWE at individual stations within the inner domain. It is important to highlight that the point-to-grid data comparison may introduce uncertainties in the verification results for individual stations. In this context, the emphasis is on the spatial heterogeneity of SWE estimation rather than asserting WRF's accuracy in estimating SWE at a specific point scale. To evaluate the SWE spatial variability, timeseries in each individual station, are depicted in Figure 5. Moreover, the elevation in each station as well as the estimated elevation by WRF simulation at all three resolutions is summarized in Table 2. Mostly in the stations on the leeward side of the mountains, including the four southern stations, there is an underestimation of SWE for all runs. In most stations, the WRF run with the finest resolution shows the best performance. SWE experiences significant changes in both space and time; therefore, the accumulation and the snowpack melting are variable because of the complex topography. During the accumulation period, the difference is more pronounced at each station. Comparison between Fig.2 and Fig.5, shows that, aggregation of the station may smooth the differences between estimations and observation. This effect that is previously introduced by Blöschl (1999) as aggregation filtering, may cause by the change of scale due to the aggregation.

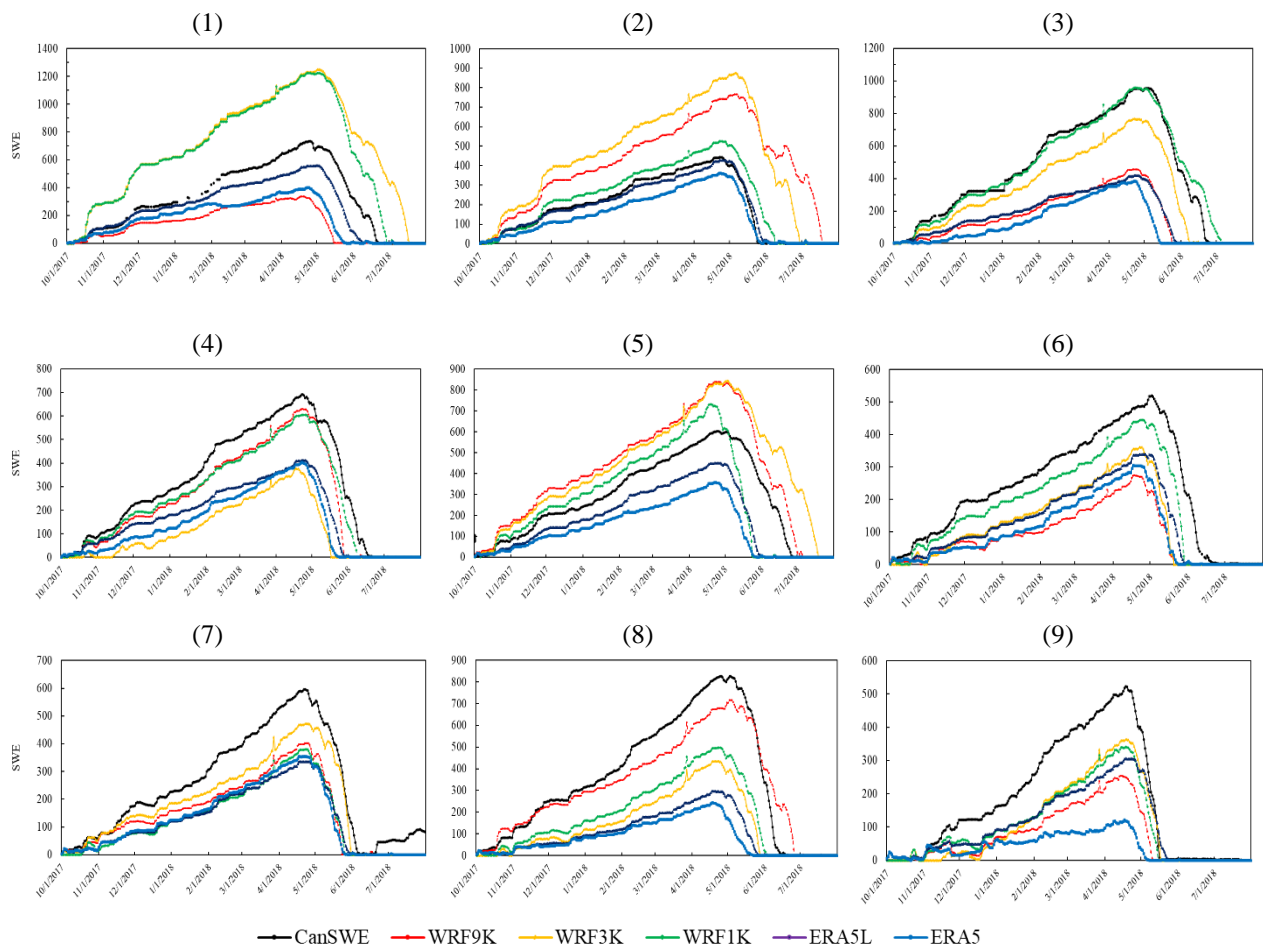

Figure 5. Estimation of SWE using WRF comparing to the CanSWE data for station 1 to 9.



Table 2. Observed elevation of each station vs. the estimated elevation by WRF.

| Station Number | Observation | Elevation(m) |       |       |
|----------------|-------------|--------------|-------|-------|
|                |             | WRF9K        | WRF3K | WRF1K |
| 1              | 2122        | 2099         | 2372  | 2413  |
| 2              | 2120        | 2500         | 2712  | 2225  |
| 3              | 2090        | 2086         | 2233  | 2218  |
| 4              | 2230        | 2199         | 2028  | 2164  |
| 5              | 2160        | 2365         | 2479  | 2483  |
| 6              | 2120        | 2144         | 2163  | 2306  |
| 7              | 2060        | 2242         | 2345  | 2118  |
| 8              | 2130        | 2265         | 2156  | 2158  |
| 9              | 1920        | 1834         | 1894  | 1856  |

Spatial distribution and extent of the SWE for each WRF horizontal resolution are shown in Figure 6(a-f) for accumulation and melting period. As shown in section 3-1, snow accumulates in the mountains from October through April, and snowmelt usually begins in May. **The spatial variability in SWE is influenced by various processes occurring across different spatial scales. For example, spatial variability in snow accumulation in mountainous regions may result from the preferential deposition of snow in microscale topographic depressions (Clark et al. 2011).** Winds cause the redistribution of snow in the alpine zone, with scouring on the windward side of ridges, and deposition on the leeward side (Clow et al., 2012). Both periods show similar spatial distribution of SWE, however, the impact of resolution is obvious. There is a maximum in SWE value in all three simulations over northern parts of the domain both for accumulation and melting period. During the accumulation period, **WRF1K** has larger SWE values in compare with **WRF9K** in most areas.

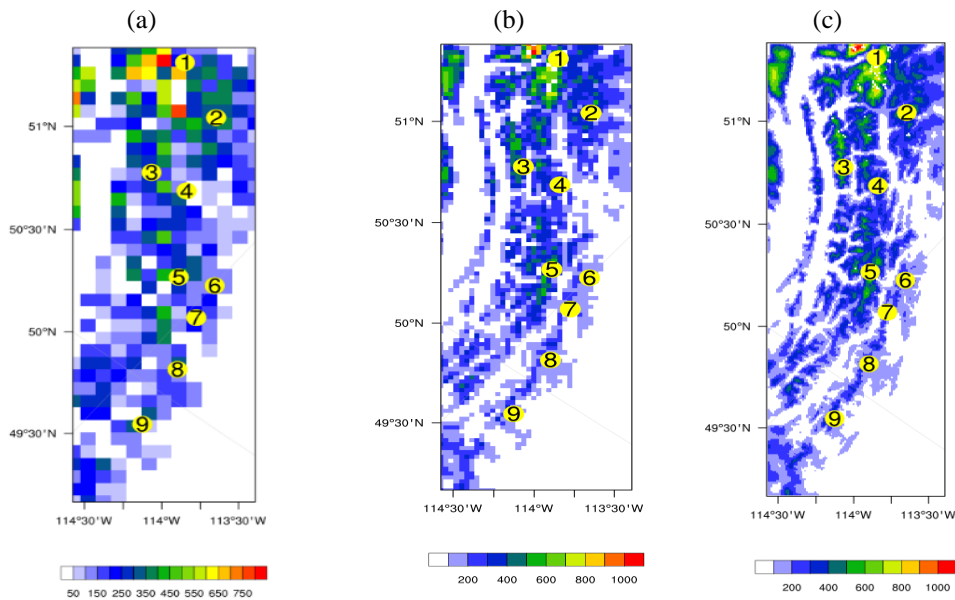

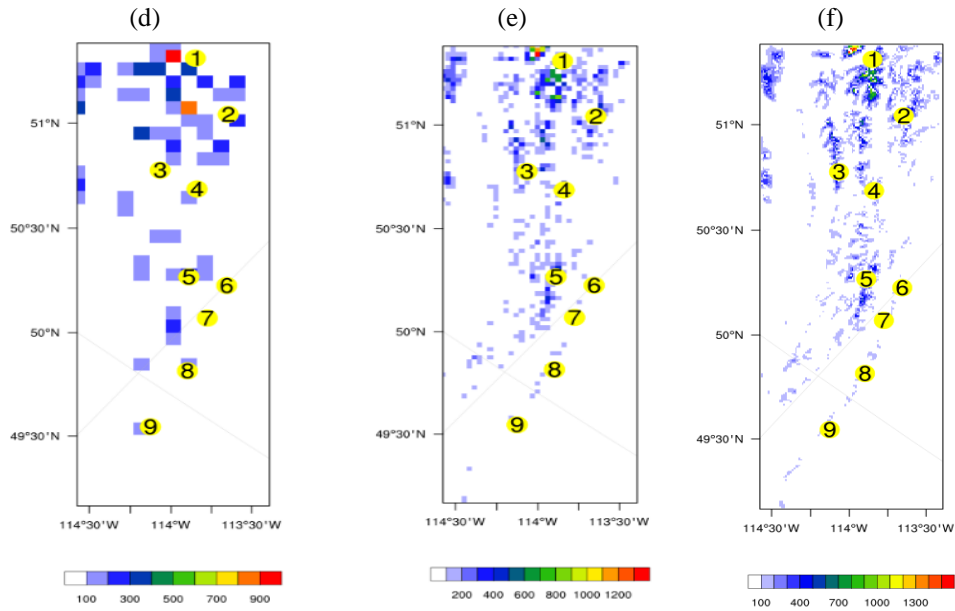

Figure 6. Simulated mean SWE ( $\text{kg}/\text{m}^2$ ) during the accumulation (1st October 2017- 22nd April 2018) and melting (23rd April 2018 to 1st October 2018) period for WRF9K (a,d), WRF3K(b,e) and WRF1K (c,f) over the inner model domain.

To show the errors of the estimates spatially, RMSE, bias, MAE and SD in each station are compared in Figure 7 for the accumulation and melting periods. This indicates a geographic sensitivity to bias and errors. Both rms and mean absolute errors show that the estimates are more accurate in the southern portion of the domain, where there is also a negative bias. Result implies that during the melting period, model horizontal resolution becomes critical and there is a substantial SWE underestimation results with coarser resolution. Large differences in SD occurred during melting season, however in most of the stations WRF1K performs better than the other two resolutions. Factors such as snow drifting, wind scour, and falling debris may also affect patterns and produce different melt rates during the melting period (Dressler et al. 2006).

There are a number of factors that complicate SWE estimation spatially. Spatial variability of the environment, including elevation, slope of the mountain and boundary roughness, changes continuously from place to place, so greatly affects the SWE estimation (Blöschl,1999, Rice and Bales, 2010). In the following section, results are analyzed to investigate the role of the terrain elevation in explaining the model errors and biases in SWE simulation.

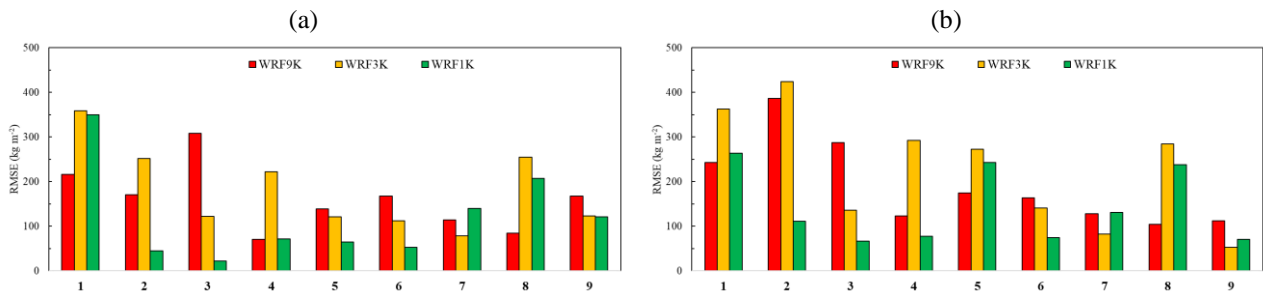

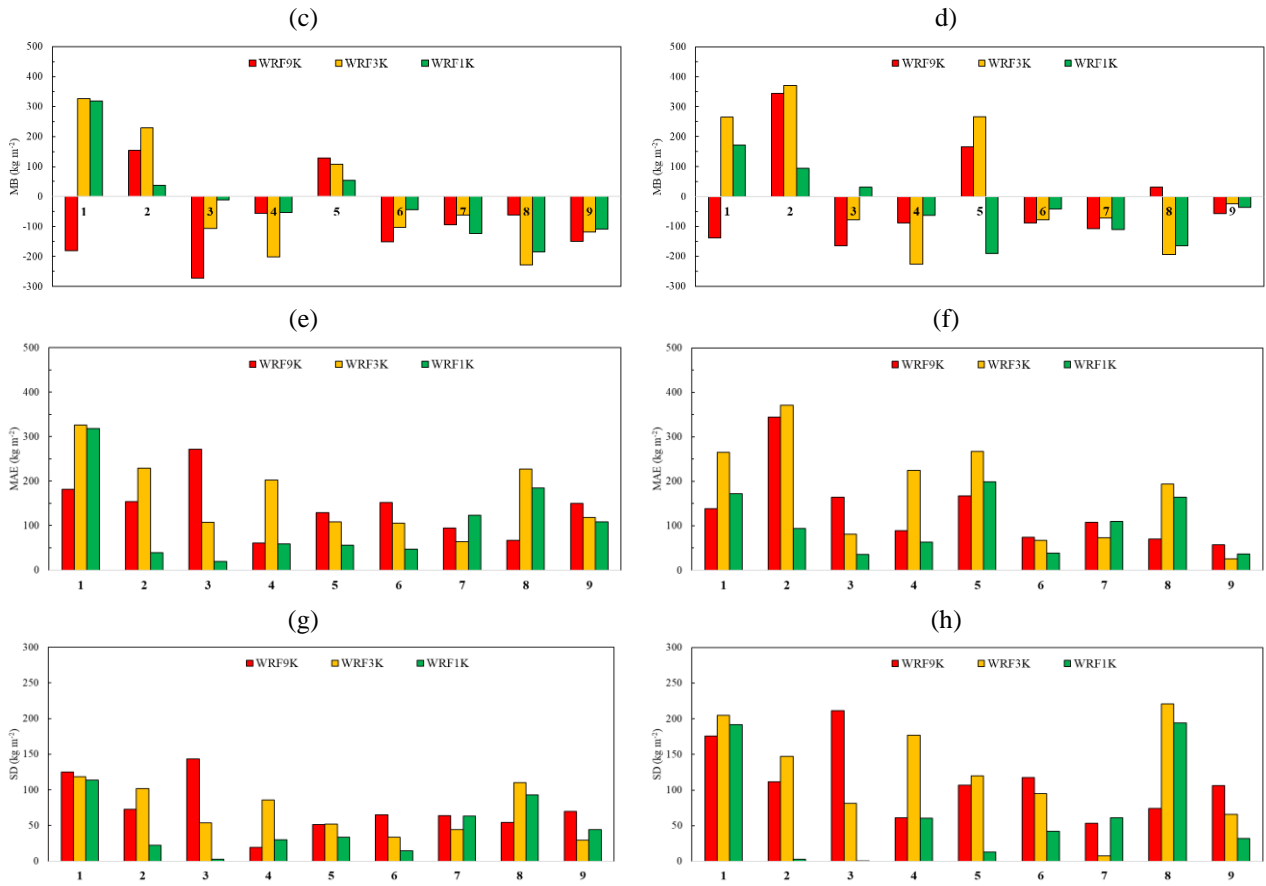

Figure 7. Evaluation metrics for each station including RMSE (a,b), MB (c,d), MAE (e,f) and SD (g,h) for accumulation (left column) and melting (right column) period.

To study the ability of WRF model to estimate the date and the value of peak SWE at each station, Table 3 and Figure 8 evaluated the estimated peak SWE date and values, respectively. Late April to early May 2018 is an approximate estimation of the peak SWE date over the region in according to the observation (Table 3). Across the nine stations there is an approximately two-week spread in the observed dates of peak SWE between 18 April and 3 May, and the magnitude of the peak appears unrelated to its date. **The course resolution may affect the predicted peak SWE, which is the consequence of averaging snow-free features into larger snow-covered cells.** WRF1K is in good agreement with CanSWE for the date and value of peak SWE in most stations.

Table 5. Comparison between the date of maximum SWE in CanSWE and anomalies in estimated peak SWE date by WRF in each station during 1<sup>st</sup> October 2017-2018. The anomaly shows the number of days that peak SWE is before/after CanSWE.

| Station | Peak SWE Date | Peak SWE Date Anomaly (Day) |       |       |
|---------|---------------|-----------------------------|-------|-------|
|         | CanSWE        | WRF9K                       | WRF3K | WRF1K |
| 1       | 24-Apr        | -6                          | 8     | 8     |
| 2       | 23-Apr        | 12                          | 12    | -1    |
| 3       | 25-Apr        | -3                          | -3    | -3    |
| 4       | 23-Apr        | -1                          | -5    | -1    |
| 5       | 25-Apr        | -3                          | 7     | -7    |
| 6       | 2-May         | -14                         | -9    | -9    |
| 7       | 22-Apr        | 1                           | 0     | 0     |
| 8       | 3-May         | -1                          | -15   | -11   |
| 9       | 18-Apr        | -4                          | 0     | 0     |

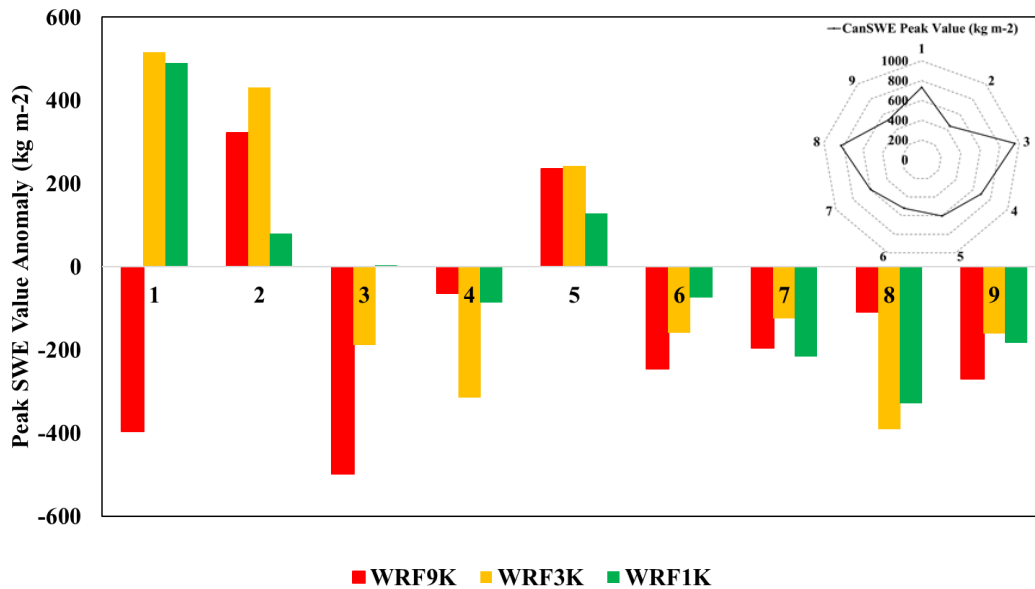

Figure 8. The anomalies in the value WRF maximum SWE estimation for each station during 1<sup>st</sup> October 2017-2018. The anomaly shows how much the value of SWE is estimated more/less at each resolution (1 to 9). The value of maximum SWE for CanSWE at each station is shown in the upper right.

Although the timing of the peak SWE is quite similar across all stations, there are differences in the estimated magnitude of maximum SWE in each WRF resolution (Figure 8). In most stations, WRF underestimate the value of the peak SWE, however, it tends to overestimate the value of the peak SWE in the two northern stations.

### 3-3 The role of elevation

There are clear differences in the surface terrain height imposed as the lower boundary condition for the three resolutions of WRF (Fig.9), which suggests a possible role for elevation in the errors in simulated SWE. As is common, the spatial variability in elevation is more pronounced in the highest resolution simulation (Fig.9c) and becomes smoother with decreasing the spatial resolution (Figs.9 a, b). In the northern portion of the domain, where the simulated SWE estimates are less accurate, the elevation is higher and more variable than the southern areas. **Because of the larger spacing of the data in WRF9K, the small-scale variability in features may not be captured. A potential explanation for the SWE biases is that the WRF9K was not fine enough to resolve the localized peaks in the mountainous topography that experience a cooler mean climate and, typically, higher mean SWE.**

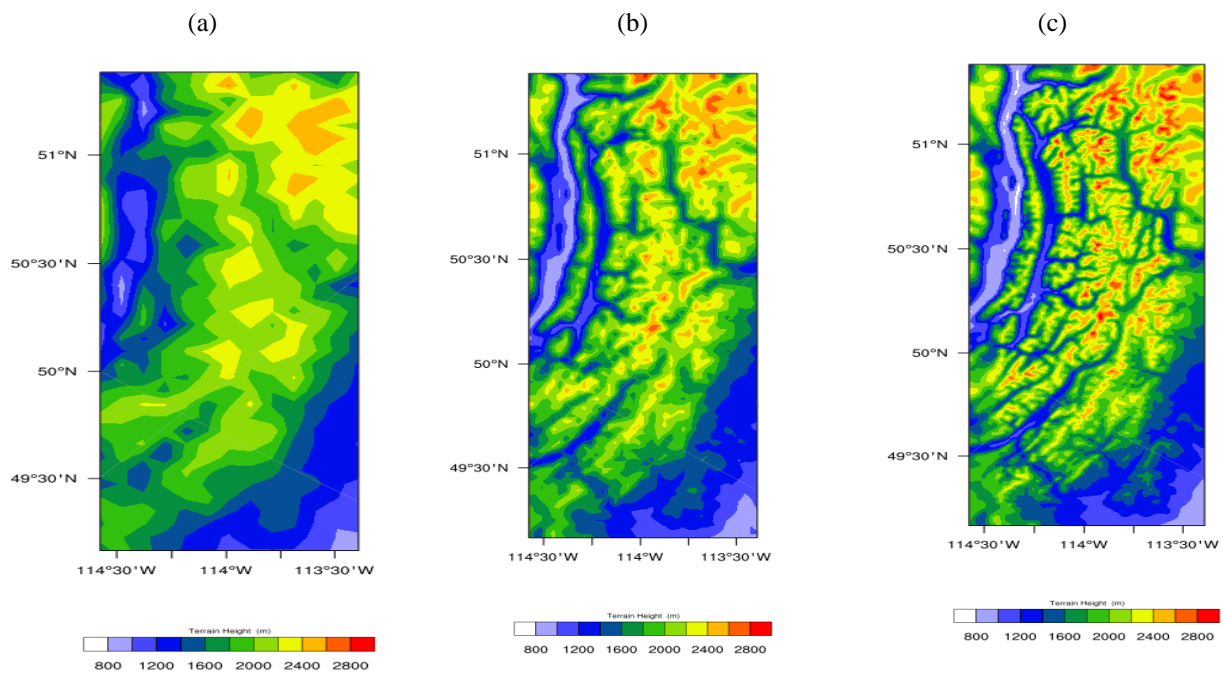

Figure 9. Spatial distribution of terrain height for WRF9K (a), WRF3K (b) and WRF1K(c) during the 2018 water year.

Correlation analysis shows that the absolute grid cell elevation is not correlated with SWE MB, RMSE or MAE (not shown); however, the elevation *bias*—the difference between the actual station’s elevation and the estimated elevation by the model in a grid cell—does appear to play a significant role. Elevation bias shows a strong positive correlation with MB at all resolutions (Fig.10a), but an important finding is that the correlation becomes weaker at higher resolutions. In other words, when the elevation biases are large, they are a better indicator of the bias in SWE, and when elevation biases are small, they do not contribute as much to SWE errors. Therefore, it can be deduced that all WRF estimations include uncertainties and biases in simulating SWE, and one important source is biases in the grid cell elevation. On the other hand, elevation bias is not significantly correlated with error metrics at any resolution; however, the value of correlation coefficient becomes stronger at finer resolutions. This implies that error likely depends on other atmospheric variables rather than elevation. Previous research highlighted measurement inaccuracies due to instrumentation sensitivities and equipment issues like ice bridging in mountainous areas when using snow pillows (Dressler et al. 2006). Therefore, additional perspectives could be considered in future work to better understand the mechanisms and potential cause of uncertainties in SWE estimations over the mountains.

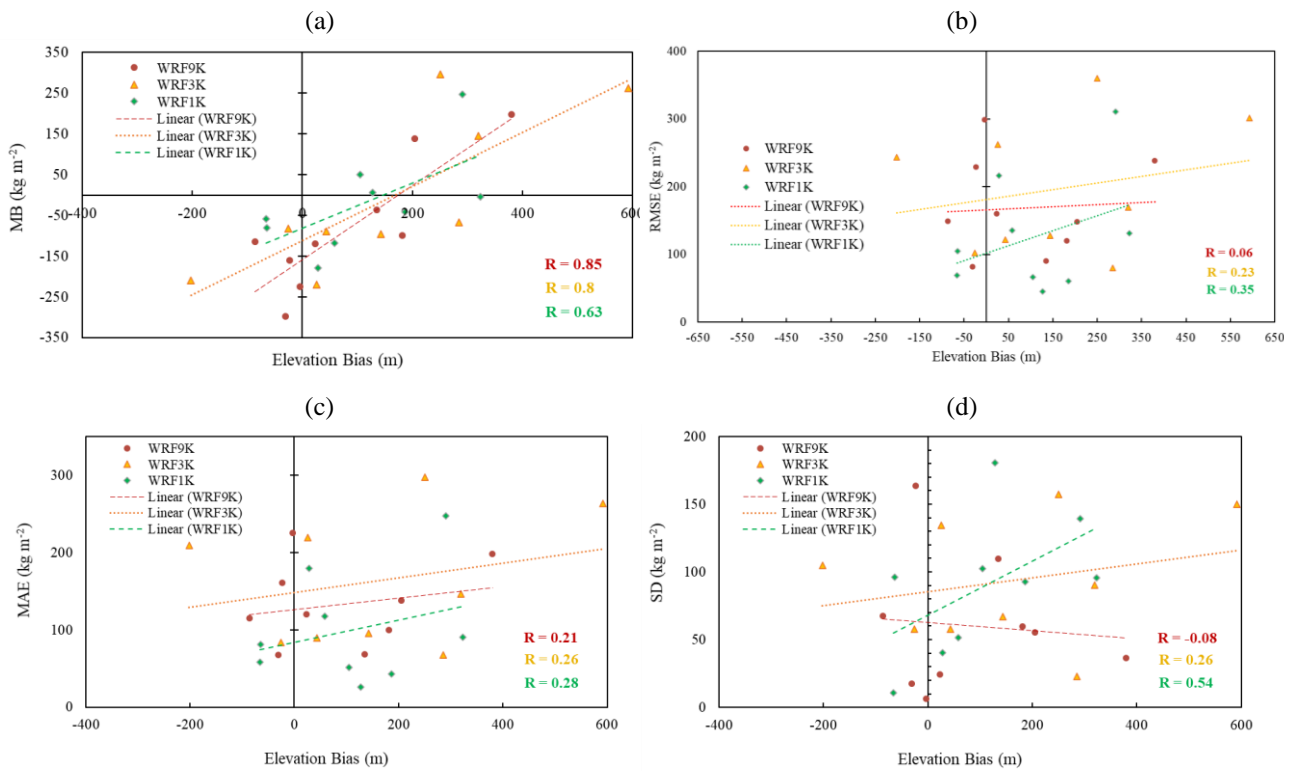

Figure 10. Elevation bias against MB (a), RMSE (b), MAE (c) and SD (d) of SWE estimation.

#### 4- Discussion and Conclusions

The objective of this study is to evaluate the potential of the high-resolution Weather Research and Forecasting (WRF) model to detect the daily values of snow water equivalent (SWE) over the South Saskatchewan River Basin (SSRB) in Western Canada. Three nested domains with fine horizontal resolution of 9, 3 and 1 km are used. Canadian historical Snow Water Equivalent (CanSWE) dataset is used to evaluate the potential of WRF to detect the spatio-temporal variability in SWE. The evaluation was conducted from 1st October 2017 to 1st October 2018, as the 2018 water year, with average SWE values during 1984 to 2021. **Special focus is given to investigate the role of WRF model grid cell size on the accurate estimation of peak SWE time and value across the watershed. Although it is acknowledged that the use of point data for the evaluation of WRF gridded SWE is problematic and introduce uncertainties because of scaling issues,** we attempt to mitigate these issues by using a spatial mean taken over all stations. However, earlier studies also showed that the small-scale SWE can be representative of the grid mean value (e.g., Pan et al., 2003) for the local SWE evaluation.

In general, our initial results over the averaged area, show that all WRF runs behaves nearly similar and show high value of correlation with CanSWE data, though there is a slight difference exist between accumulation and melting period. All WRF estimations mainly tend to underestimate SWE over the whole year, with a largest negative bias in the coarsest resolutions. Results show that WRF fine resolution (at 3km and 1km), significantly improves the simulations of SWE during the year over an averaged area. The coarsest run shows less accuracy during accumulation period, which is likely caused by a systematic bias in accumulated precipitation at 9km. The underestimated precipitation over the mountainous regions at coarse resolutions has been shown by Li et al. (2019). The large bias in the coarsest resolution also may be due to the incapability of the **WRF9K** to simulate the processes



that are responsible for snow deposition and **redistribution** in mountainous areas (Mott et al., 2018; Raparelli et al. 2021). **Over the whole region, there is an obvious tendency for RMSE, MB, MAE and SD to decrease at finer resolutions, therefore, decreasing the horizontal grid spacing within WRF, lead to the reliable SWE estimate over the SSRB region.** So, it can be concluded that the accuracy of SWE is closely related to the horizontal resolution. Earlier studies also revealed that there is a dependence of snow estimation on NWP model resolution to capture the orographic processes over the Western Canada and US (Pavelsky et al. 2011; Schirmer and Jamieson, 2015; Wrzesien et al. 2015).

**The spatial variability in SWE is influenced by various processes including variability in snow accumulation that result from the preferential deposition of snow in microscale topographic depressions.** Evaluation of the SWE in individual station showed that there is less amount of snow on the windward side of ridges, and snow deposition on the leeward side. Mostly on the leeward side of the mountains, there is an underestimation of SWE for all WRF performances. There is a maximum in SWE value in all three simulations over northern parts of the domain both for accumulation and melting period. Low temperatures and high cyclonic activity over the northern part of the domain may cause long snow duration and high value of SWE (SWIPA, 2011). Local characteristics of each station, including the terrain and land cover characteristics, as well as the interactions with the local wind, would play a major role in SWE variability over the region.

Investigating the ability of WRF model to estimate the date and the value of peak SWE in each station reveal that there is an approximately two-week spread in the observed dates of peak SWE between late April and early May, in accordance with the observation. Although the timing of the peak SWE is quite similar across all stations, there are differences in the estimated magnitude of maximum SWE in each WRF resolution. In most stations, the value of the peak SWE is underestimated, which is consistent with the findings of previous studies (e.g., Jin and Wen, 2012; Wrzesien et al., 2018; He et al., 2019), however, **WRF1K** is in good agreement with CanSWE for the date and value of peak SWE. Overall, WRF can also provide reliable data for peak SWE date and value, especially in fine horizontal resolution.

Analysis of the role of elevation shows that elevation itself doesn't show any correlation with MB, MAE and RMSE however the elevation bias shows a strong positive correlation with MB at all resolutions, which becomes weaker at higher resolutions and would be a better indicator of the bias in SWE in coarse resolution. This result highlights an important consideration when comparing point observations to output from a model grid cell, namely that the agreement in elevation between any individual station and the model's mean elevation in a grid cell will be closer, on average, for a 1 km grid cell compared to a 9 km grid cell. **This is because the actual topography and associated elevation will typically be much more variable over an area of 81 km<sup>2</sup> than over 1 km<sup>2</sup>.** Another way to frame this is that an individual station is significantly less representative of the actual variations in elevation, precipitation, SWE etc. within a 9 km grid cell than a 1 km grid cell, and so one might find better agreement between the model and a distributed network of stations within the grid cell. Unresolved topography contributes to the inaccurate SWE estimation in the coarse resolution. The bias in elevation, meaning the lower or upper mountains, affect the condensation of water vapor, precipitation, topography related temperature and therefore the amount of estimated SWE over the region. An earlier study also showed that increasing resolution in regional models resolve more small-

scale features (Xu et al., 2019) and therefore improve SWE estimation. **On the other hand, as the elevation bias does not impact the RMSE, MAE and SD in any resolution**, error likely depends on other atmospheric variables rather than elevation. Therefore, additional perspectives could be considered in future work to better understand the mechanisms and potential cause of uncertainties in SWE estimations over the mountains.

In the end, this study has shown that high resolution WRF can provide reliable and reasonable estimates of SWE values as an input data for accurate hydrologic modeling, required for runoff forecasts. Analysis presented in this paper revealed that WRF's high resolution can represent spatio-temporal variability of SWE over the mountainous region, and it is expected to be helpful for flood forecasting in mountainous regions. However, further work is needed to remove the biases and capture the accurate value of SWE over the western Canada.

### **Acknowledgments**

We greatly acknowledge Neha Kanda from the University of Waterloo for her technical support in this work.

### **References**

- Andreadis, K. M., and Lettenmaier, D. P. (2006). Assimilating remotely sensed snow observations into a macroscale hydrology model. *Advances in water resources*, 29(6), 872-886.
- AMAP (2011). *Snow, Water, Ice and Permafrost in the Arctic (SWIPA): Climate Change and the Cryosphere*. Arctic Monitoring and Assessment Programme (AMAP), Oslo, Norway, 538 pp.
- Ashmore, P., and Church, M. (2001). The impact of climate change on rivers and river processes in Canada. *Geological Survey of Canada, Bulletin 555*.
- Alonso-González, E., López-Moreno, J.I., Gascoin, S., García-Valdecasas Ojeda, M., Sanmiguel-Valladolid, A., Navarro-Serrano, F., Revuelto, J., Ceballos, A., Esteban-Parra, M.J. and Essery, R., (2018). Daily gridded datasets of snow depth and snow water equivalent for the Iberian Peninsula from 1980 to 2014. *Earth System Science Data*, 10(1), 303-315.
- Barnett, T. P., Adam, J. C., and Lettenmaier, D. P. (2005). Potential impacts of a warming climate on water availability in snow-dominated regions. *Nature*, 438(7066), 303-309.
- Blöschl, G. (1999). Scaling issues in snow hydrology. *Hydrological processes*, 13(14-15), 2149-2175.**
- Clark, M. P., J. Hendrikx, A. G. Slater, D. Kavetski, B. Anderson, N. J. Cullen, T. Kerr, E. Orn Hreinsson, and R. A. Woods, (2011) Representing spatial variability of snow water equivalent in hydrologic and land-surface models: A review. *Water Resour. Res.*, 47, W07539.**
- Clow, D. W., Nanus, L., Verdin, K. L., and Schmidt, J. (2012). Evaluation of SNODAS snow depth and snow water equivalent estimates for the Colorado Rocky Mountains, USA. *Hydrological Processes*, 26(17), 2583-2591.

- Cui, G., Anderson, M., and Bales, R. (2023). Mapping of snow water equivalent by a deep-learning model assimilating snow observations. *Journal of Hydrology*, 616, 128835.
- Diaconescu, E. P., Gachon, P., Laprise, R., and Scinocca, J. F. (2016). Evaluation of precipitation indices over North America from various configurations of regional climate models. *Atmosphere-Ocean*, 54(4), 418-439.
- Dixon, D., and Boon, S. (2012). Comparison of the SnowHydro snow sampler with existing snow tube designs. *Hydrological Processes*, 26(17), 2555-2562.
- Dozier, J., Bair, E. H., and Davis, R. E. (2016). Estimating the spatial distribution of snow water equivalent in the world's mountains. *Wiley Interdisciplinary Reviews: Water*, 3(3), 461-474.
- Dressler, K. A., Fassnacht, S. R., & Bales, R. C. (2006). A Comparison of Snow Telemetry and Snow Course Measurements in the Colorado River Basin. *Journal of Hydrometeorology*, 7.
- ECCC (2022) Canadian Environmental Sustainability Indicators: Snow cover: <https://www.canada.ca/en/environment-climate-change/services/environmental-indicators/snow-cover.html>.
- Elder, K., Rosenthal, W., and Davis, R. E. (1998). Estimating the spatial distribution of snow water equivalence in a montane watershed. *Hydrological Processes*, 12(10-11), 1793-1808.
- Garvert, M. F., Smull, B., and Mass, C. (2007). Multiscale mountain waves influencing a major orographic precipitation event. *Journal of the atmospheric sciences*, 64(3), 711-737.
- He, C., Chen, F., Barlage, M., Liu, C., Newman, A., Tang, W., Ikeda, K. and Rasmussen, R., (2019). Can convection-permitting modeling provide decent precipitation for offline high-resolution snowpack simulations over mountains?. *Journal of Geophysical Research: Atmospheres*, 124(23), pp.12631-12654.
- Hersbach, H., Bell, B., Berrisford, P., Hirahara, S., Horányi, A., Muñoz-Sabater, J., Nicolas, J., Peubey, C., Radu, R., Schepers, D. and Simmons, A. (2020). The ERA5 global reanalysis. *Quarterly Journal of the Royal Meteorological Society*, 146(730), 1999-2049.
- Holtzman, N. M., Pavelsky, T. M., Cohen, J. S., Wrzesien, M. L., and Herman, J. D. (2020). Tailoring WRF and Noah-MP to improve process representation of Sierra Nevada runoff: Diagnostic evaluation and applications. *Journal of Advances in Modeling Earth Systems*, 12(3), e2019MS001832.
- Jin, J., and Wen, L. (2012). Evaluation of snowmelt simulation in the Weather Research and Forecasting model. *Journal of Geophysical Research: Atmospheres*, 117(D10).
- Johnson, J. B., and Marks, D. (2004). The detection and correction of snow water equivalent pressure sensor errors. *Hydrological Processes*, 18(18), 3513-3525.
- Klehmet, K., Geyer, B. and Rockel, B., 2013. A regional climate model hindcast for Siberia: analysis of snow water equivalent. *The Cryosphere*, 7(4), pp.1017-1034.
- Kinar, N. J., and Pomeroy, J. W. (2015). Measurement of the physical properties of the snowpack. *Reviews of Geophysics*, 53(2), 481-544.

- King, F., Erler, A. R., Frey, S. K., and Fletcher, C. G. (2020). Application of machine learning techniques for regional bias correction of snow water equivalent estimates in Ontario, Canada. *Hydrology and Earth System Sciences*, 24(10), 4887-4902.
- Leung, L. R., and Qian, Y. (2003). The sensitivity of precipitation and snowpack simulations to model resolution via nesting in regions of complex terrain. *Journal of Hydrometeorology*, 4(6), 1025-1043.
- Leung, L. R., Qian, Y., Han, J., and Roads, J. O. (2003). Intercomparison of global reanalyses and regional simulations of cold season water budgets in the western United States. *Journal of Hydrometeorology*, 4(6), 1067-1087.
- Li, Y., Li, Z., Zhang, Z., Chen, L., Kurkute, S., Scaff, L., and Pan, X. (2019). High-resolution regional climate modeling and projection over western Canada using a weather research forecasting model with a pseudo-global warming approach. *Hydrology and Earth System Sciences*, 23(11), 4635-4659.
- Li, Y., and Li, Z. (2021). High-Resolution Weather Research Forecasting (WRF) Modeling and Projection Over Western Canada, Including Mackenzie Watershed. In *Arctic Hydrology, Permafrost and Ecosystems* (pp. 815-847). Springer, Cham.
- Liu, C., Ikeda, K., Rasmussen, R., Barlage, M., Newman, A.J., Prein, A.F., Chen, F., Chen, L., Clark, M., Dai, A. and Dudhia, J. (2017). Continental-scale convection-permitting modeling of the current and future climate of North America. *Climate Dynamics*, 49(1), 71-95.
- López-Moreno, J. I., Fassnacht, S. R., Beguería, S., and Latron, J. B. P. (2011). Variability of snow depth at the plot scale: implications for mean depth estimation and sampling strategies. *The Cryosphere*, 5(3), 617-629.
- Martz, L., Bruneau, J., Rolfe, J.T., Toth, B., Armstrong, R., Kulshreshtha, S., Thompson, W., Pietroniro, E. and Wagner, A. (2007). *Climate change and water: SSRB final technical report*. GIServices, University of Saskatchewan: Saskatoon, Canada.
- Mortezapour, M., Menounos, B., Jackson, P. L., Erler, A. R., and Pelto, B. M. (2020). The role of meteorological forcing and snow model complexity in winter glacier mass balance estimation, Columbia River basin, Canada. *Hydrological Processes*, 34(25), 5085-5103.
- Mott, R., Vionnet, V., and Grünwald, T. (2018). The seasonal snow cover dynamics: review on wind-driven coupling processes. *Frontiers in Earth Science*, 6, 197.
- Muñoz-Sabater, J., Dutra, E., Agustí-Panareda, A., Albergel, C., Arduini, G., Balsamo, G., Boussetta, S., Choulga, M., Harrigan, S., Hersbach, H. and Martens, B. (2021). ERA5-Land: A state-of-the-art global reanalysis dataset for land applications. *Earth system science data*, 13(9), pp.4349-4383.
- Niu, G.Y., Yang, Z.L., Mitchell, K.E., Chen, F., Ek, M.B., Barlage, M., Kumar, A., Manning, K., Niyogi, D., Rosero, E. and Tewari, M. (2011). The community Noah land surface model with multiparameterization options (Noah-MP): 1. Model description and evaluation with local scale measurements. *Journal of Geophysical Research: Atmospheres*, 116(D12).
- Pan, M., Sheffield, J., Wood, E.F., Mitchell, K.E., Houser, P.R., Schaake, J.C., Robock, A., Lohmann, D., Cosgrove, B., Duan, Q. and Luo, L., (2003). Snow process modeling in the North American Land

- Data Assimilation System (NLDAS): 2. Evaluation of model simulated snow water equivalent. *Journal of Geophysical Research: Atmospheres*, 108(D22).
- Pavelsky, T. M., Kapnick, S., and Hall, A. (2011). Accumulation and melt dynamics of snowpack from a multiresolution regional climate model in the central Sierra Nevada, California. *Journal of Geophysical Research: Atmospheres*, 116(D16).
- Raparelli, E., Tuccella, P., Colaiuda, V., and Marzano, F. S. (2021). Snow cover prediction in the Italian Central Apennines using weather forecast and snowpack numerical models. *The Cryosphere Discussions*, 1-37.
- Rasmussen, R., Liu, C., Ikeda, K., Gochis, D., Yates, D., Chen, F., Tewari, M., Barlage, M., Dudhia, J., Yu, W. and Miller, K., (2011). High-resolution coupled climate runoff simulations of seasonal snowfall over Colorado: a process study of current and warmer climate. *Journal of Climate*, 24(12), 3015-3048.
- Rice, R., & Bales, R. C. (2010). Embedded-sensor network design for snow cover measurements around snow pillow and snow course sites in the Sierra Nevada of California. *Water Resources Research*, 46(3).
- Schirmer, M., and Jamieson, B. (2015). Verification of analysed and forecasted winter precipitation in complex terrain. *The Cryosphere*, 9(2), 587-601.
- Skamarock, W. C. (2008). A description of the advanced research WRF version 3. Tech. Note, 1-96.
- Taheri, M., and Mohammadian, A. (2022). An Overview of Snow Water Equivalent: Methods, Challenges, and Future Outlook. *Sustainability*, 14(18), 11395.
- Tanzeeba, S., and Gan, T. Y. (2012). Potential impact of climate change on the water availability of South Saskatchewan River Basin. *Climatic change*, 112(2), 355-386.
- Vionnet, V., Fortin, V., Gaborit, E., Roy, G., Abrahamowicz, M., Gasset, N., and Pomeroy, J. W. (2020). Assessing the factors governing the ability to predict late-spring flooding in cold-region mountain basins. *Hydrology and Earth System Sciences*, 24(4), 2141-2165.
- WMO (2018): Guide to instruments and methods of observation: Volume II – Measurement of Cryospheric Variables, 2018th edn., World Meteorological Organization, Geneva, WMO-No., 8, 52 pp.
- Wrzesien, M. L., Pavelsky, T. M., Kapnick, S. B., Durand, M. T., and Painter, T. H. (2015). Evaluation of snow cover fraction for regional climate simulations in the Sierra Nevada. *International Journal of Climatology*, 35(9), 2472-2484.
- Wrzesien, M. L., Durand, M. T., Pavelsky, T. M., Howat, I. M., Margulis, S. A., and Huning, L. S. (2017). Comparison of methods to estimate snow water equivalent at the mountain range scale: A case study of the California Sierra Nevada. *Journal of Hydrometeorology*, 18(4), 1101-1119.
- Wrzesien, M. L., Durand, M. T., Pavelsky, T. M., Kapnick, S. B., Zhang, Y., Guo, J., and Shum, C. K. (2018). A new estimate of North American mountain snow accumulation from regional climate model simulations. *Geophysical Research Letters*, 45(3), 1423-1432.

Xu, Y., Jones, A., and Rhoades, A. (2019). A quantitative method to decompose SWE differences between regional climate models and reanalysis datasets. *Scientific reports*, 9(1), 16520.
